# Supplementary material for: Silica encapsulated fluorescein as a hybrid dye for blue-LED based lighting devices
Source: Royal Society of Chemistry journal article supplement (doi:10.1039/c6tc01039c), 2016-01-01

## Supplementary information

### **Silica encapsulated fluorescein as a hybrid dyes for blue-LED based lighting devices**

R. Boonsin,<sup>ab</sup> G. Chadeyron,<sup>ab\*</sup> J.-P. Roblin,<sup>ab</sup> D. Boyer,<sup>ab</sup> R. Mahiou<sup>bc</sup>

<sup>a</sup>*Université Clermont Auvergne, Sigma-Clermont, Institut de Chimie de Clermont-Ferrand, BP 10448, F-63000 Clermont-Ferrand, France.*

<sup>b</sup>*CNRS, UMR 6296, ICCF, F-63178 Aubière, France.*

<sup>c</sup>*Université Clermont Auvergne, Université Blaise Pascal, Institut de Chimie de Clermont-Ferrand, BP 10448, F-63000 Clermont-Ferrand, France.*

\* Email: Geneviève.Chadeyron@sigma-clermont.fr; Fax: +33 (0)4 73 40 71 08;

Tel: +33 (0)4 73 40 71 09

**Figure S1**

FT-IR spectra of FC@SiO<sub>2</sub> nanoparticles and fluorescein sodium salt powder.

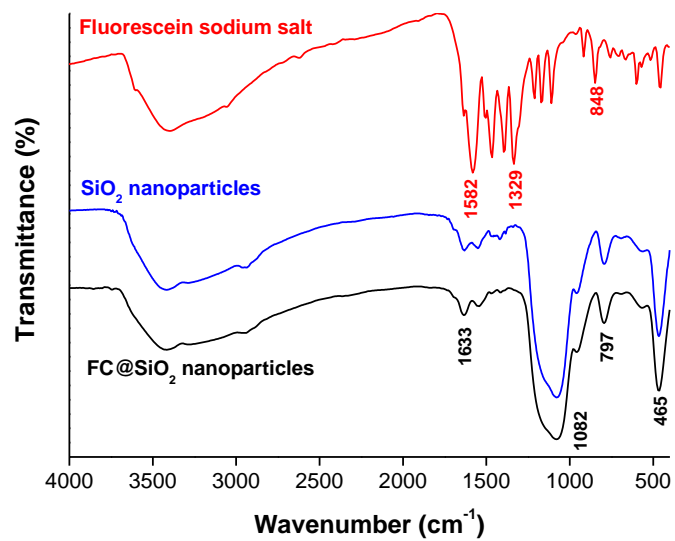

## Figure S2

The absolute quantum yield efficiency of FC@SiO<sub>2</sub> nanoparticles (prepared from 10mM fluorescein solution) presented between 250-500 nm light illuminations.

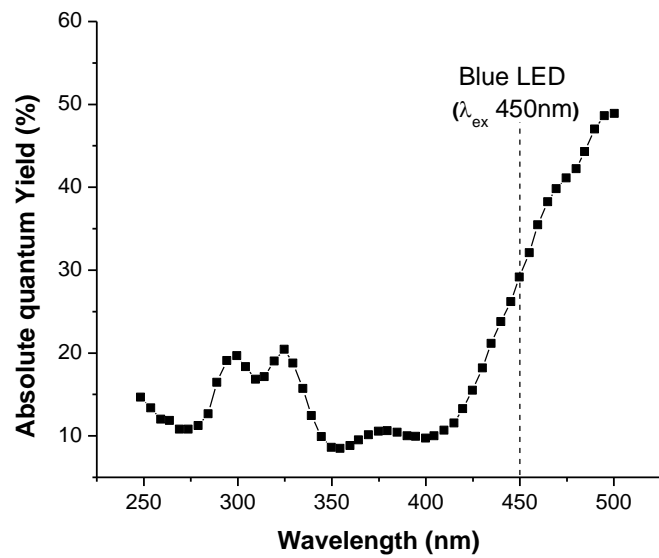

**Figure S3**

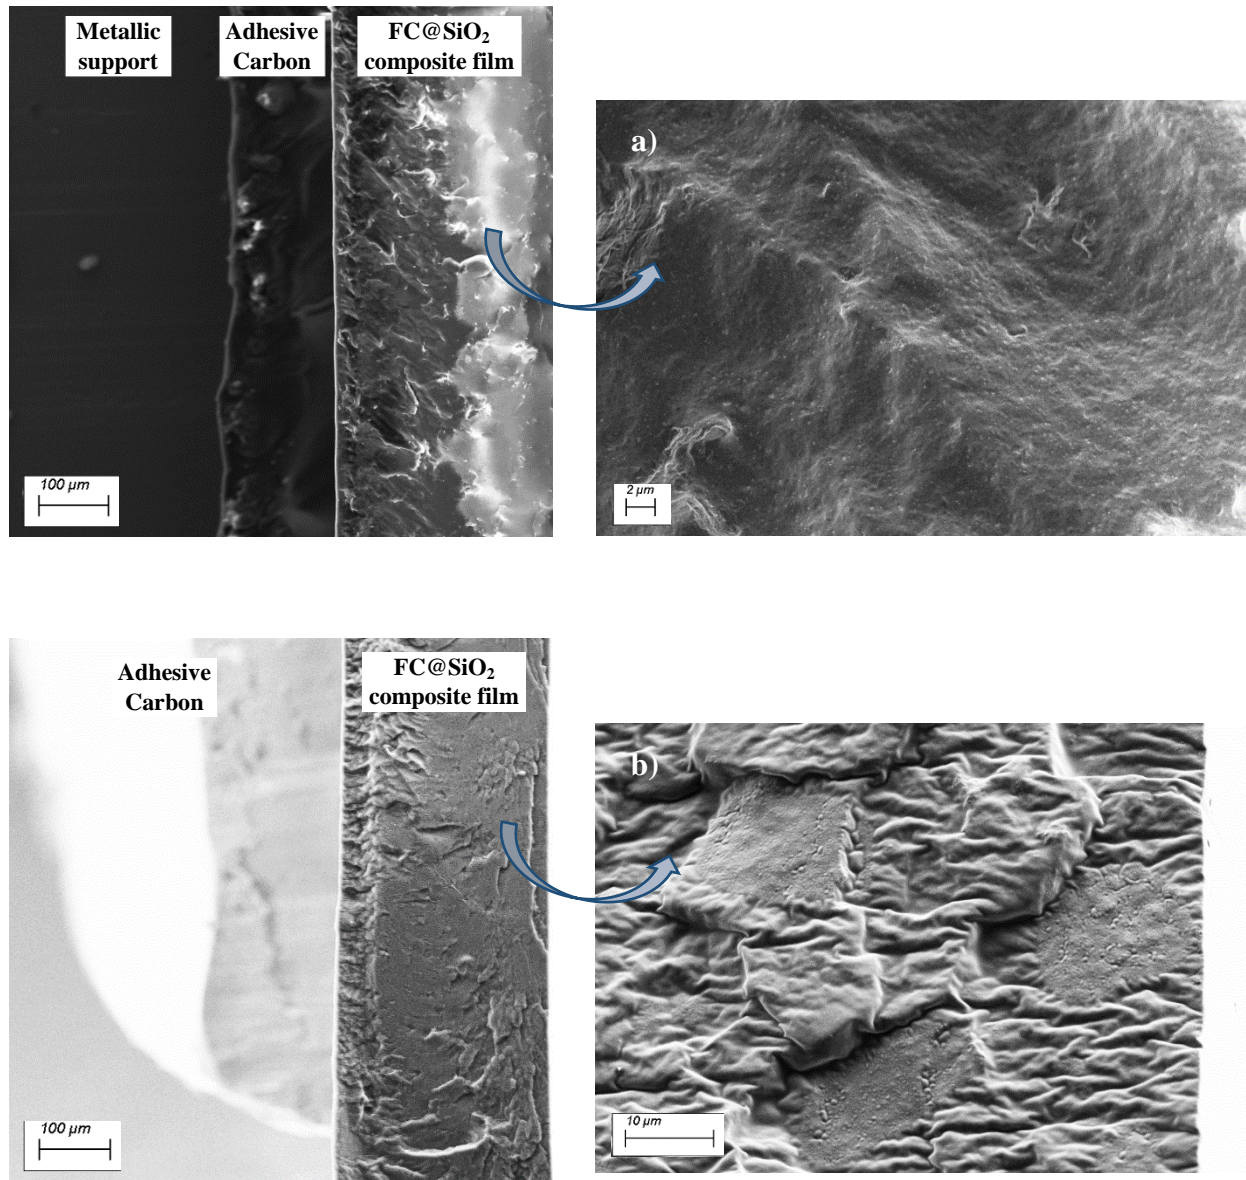

SEM images of cross-section of a) 10wt% FC@SiO<sub>2</sub> and b) 15% FC@SiO<sub>2</sub> in composite film

**Figure S4**

Schematic diagram of an FC@SiO<sub>2</sub>/silicone hybrid LED, prepared using a commercial blue LED (450nm) and FC@SiO<sub>2</sub> nanoparticles dispersed in silicone film.

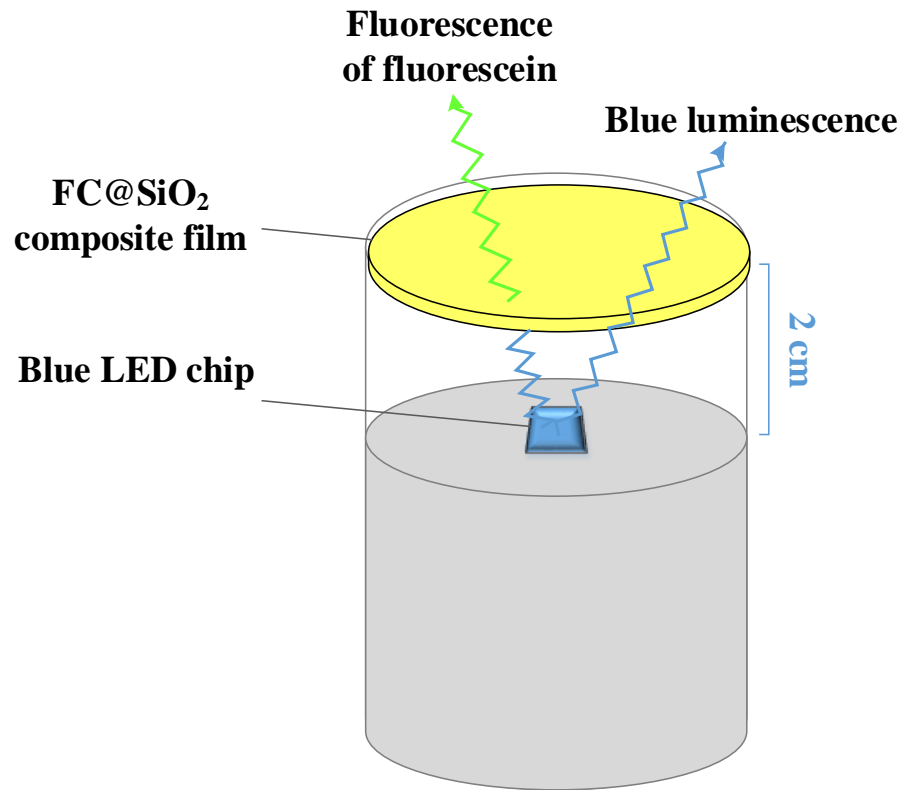

Supplement: c6tc01039c1.pdf [file c6tc01039c1.pdf]
